# Supplementary material for: Sequences of Circadian Clock Proteins in the Nudibranch Molluscs Hermissenda crassicornis, Melibe leonine, and Tritonia diomedea
Source: PubMed Central journal article supplement — Biol Bull. Author manuscript; Available in PMC 2018 Oct 11. (PMC6180908; doi:10.1086/698467), 2018-06-05
Supplement: NIHMS989462-supplement-Supplemental_Figures.pdf [file NIHMS989462-supplement-Supplemental_Figures.pdf]

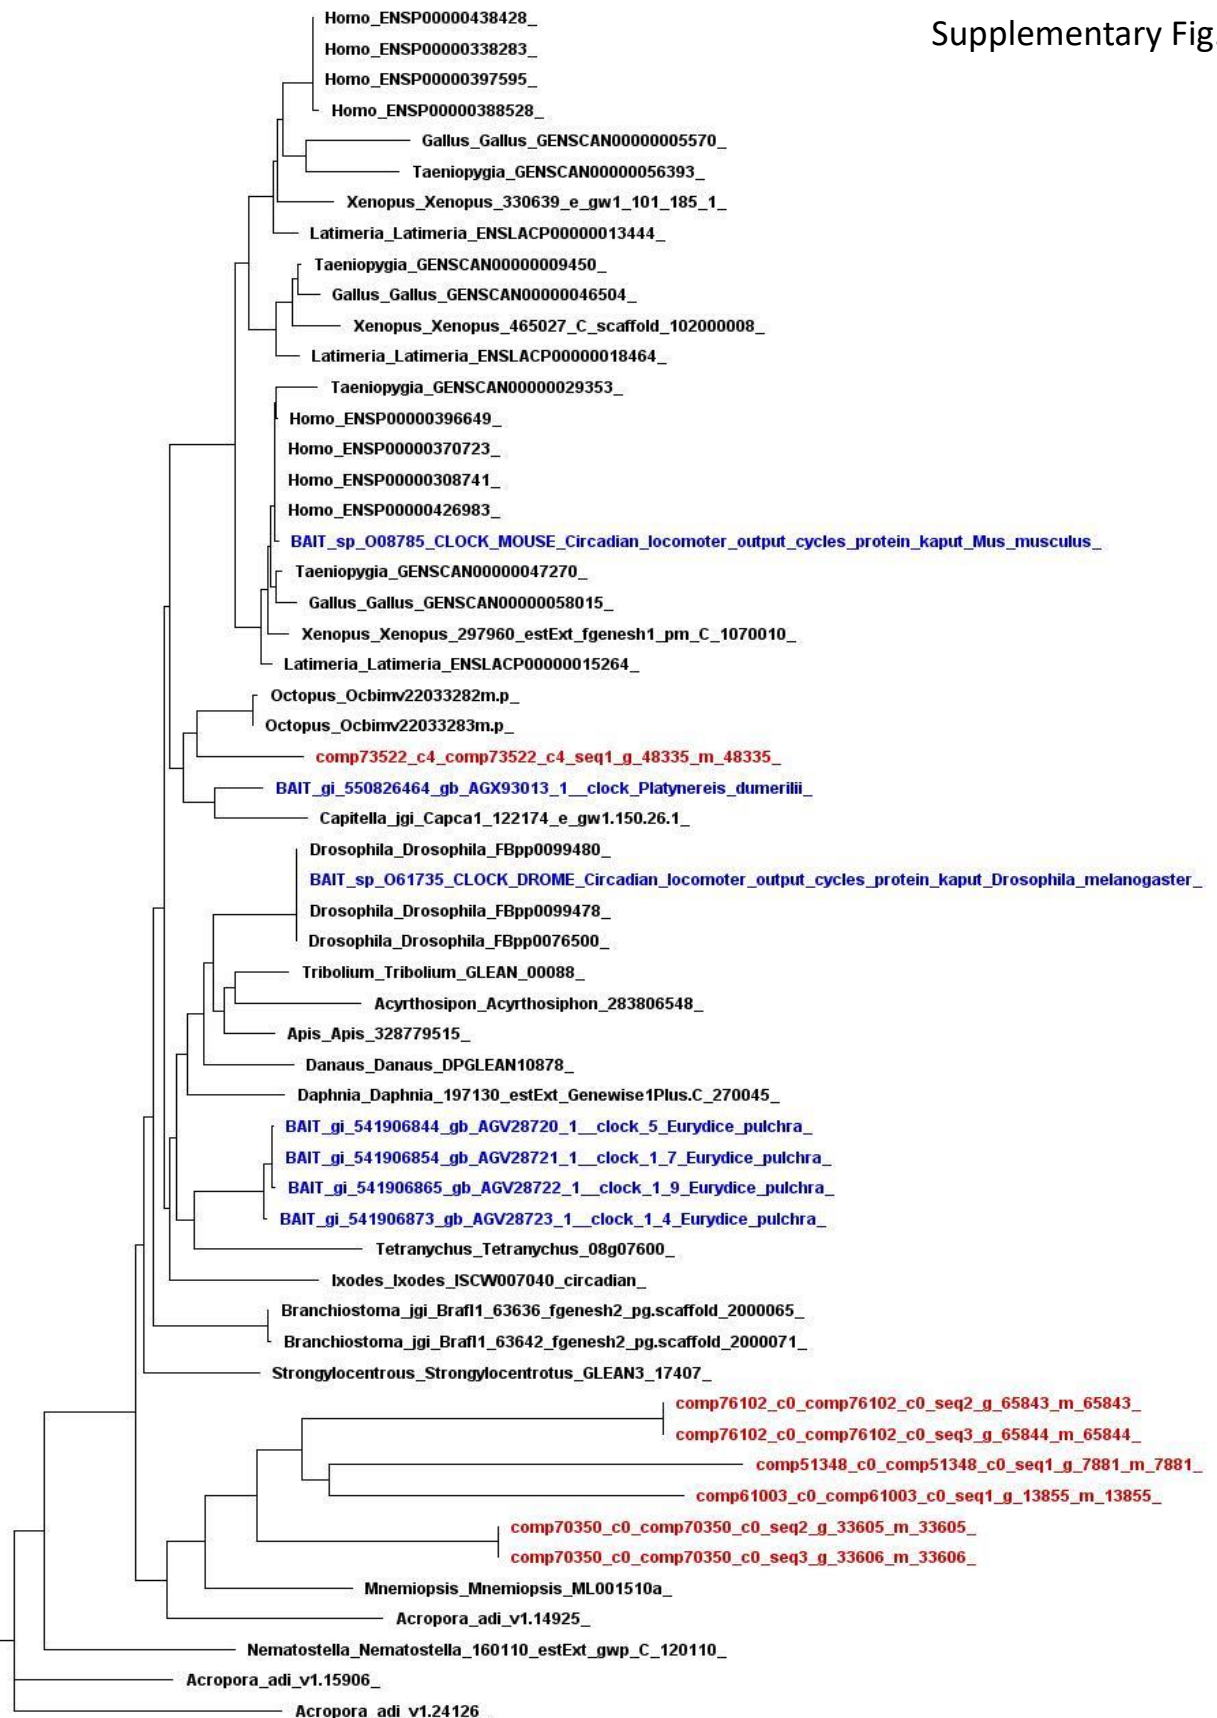

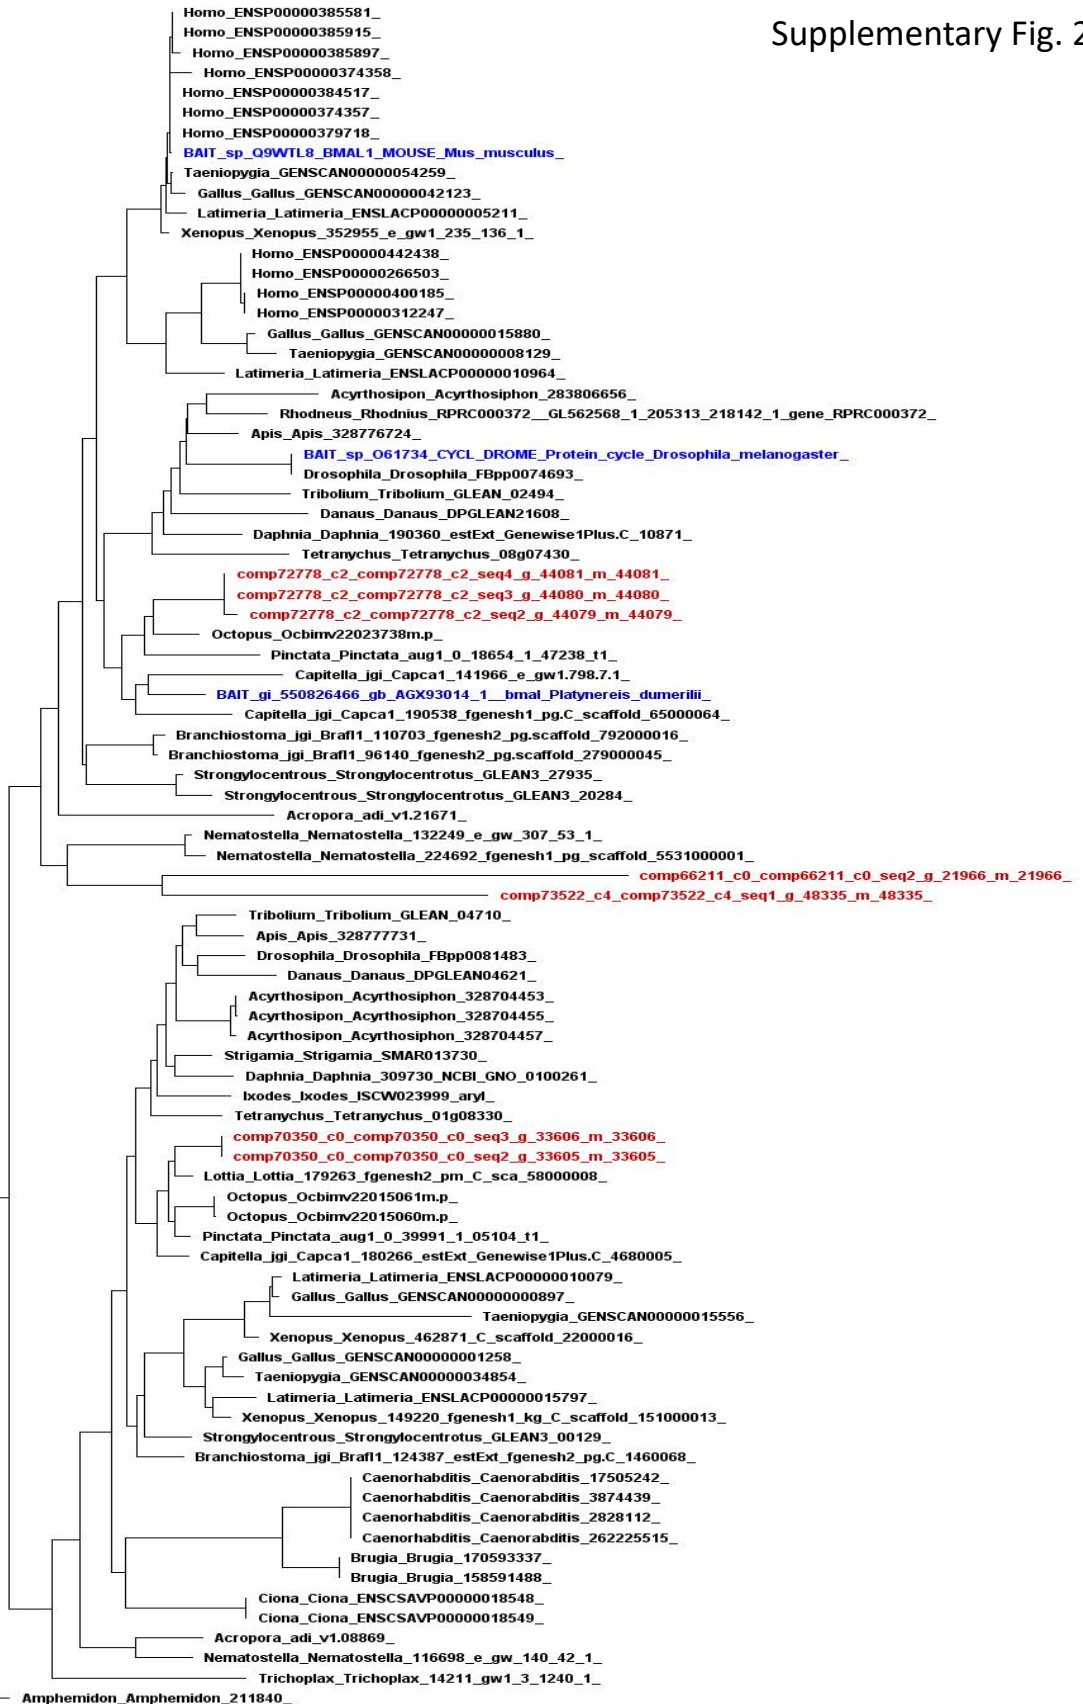

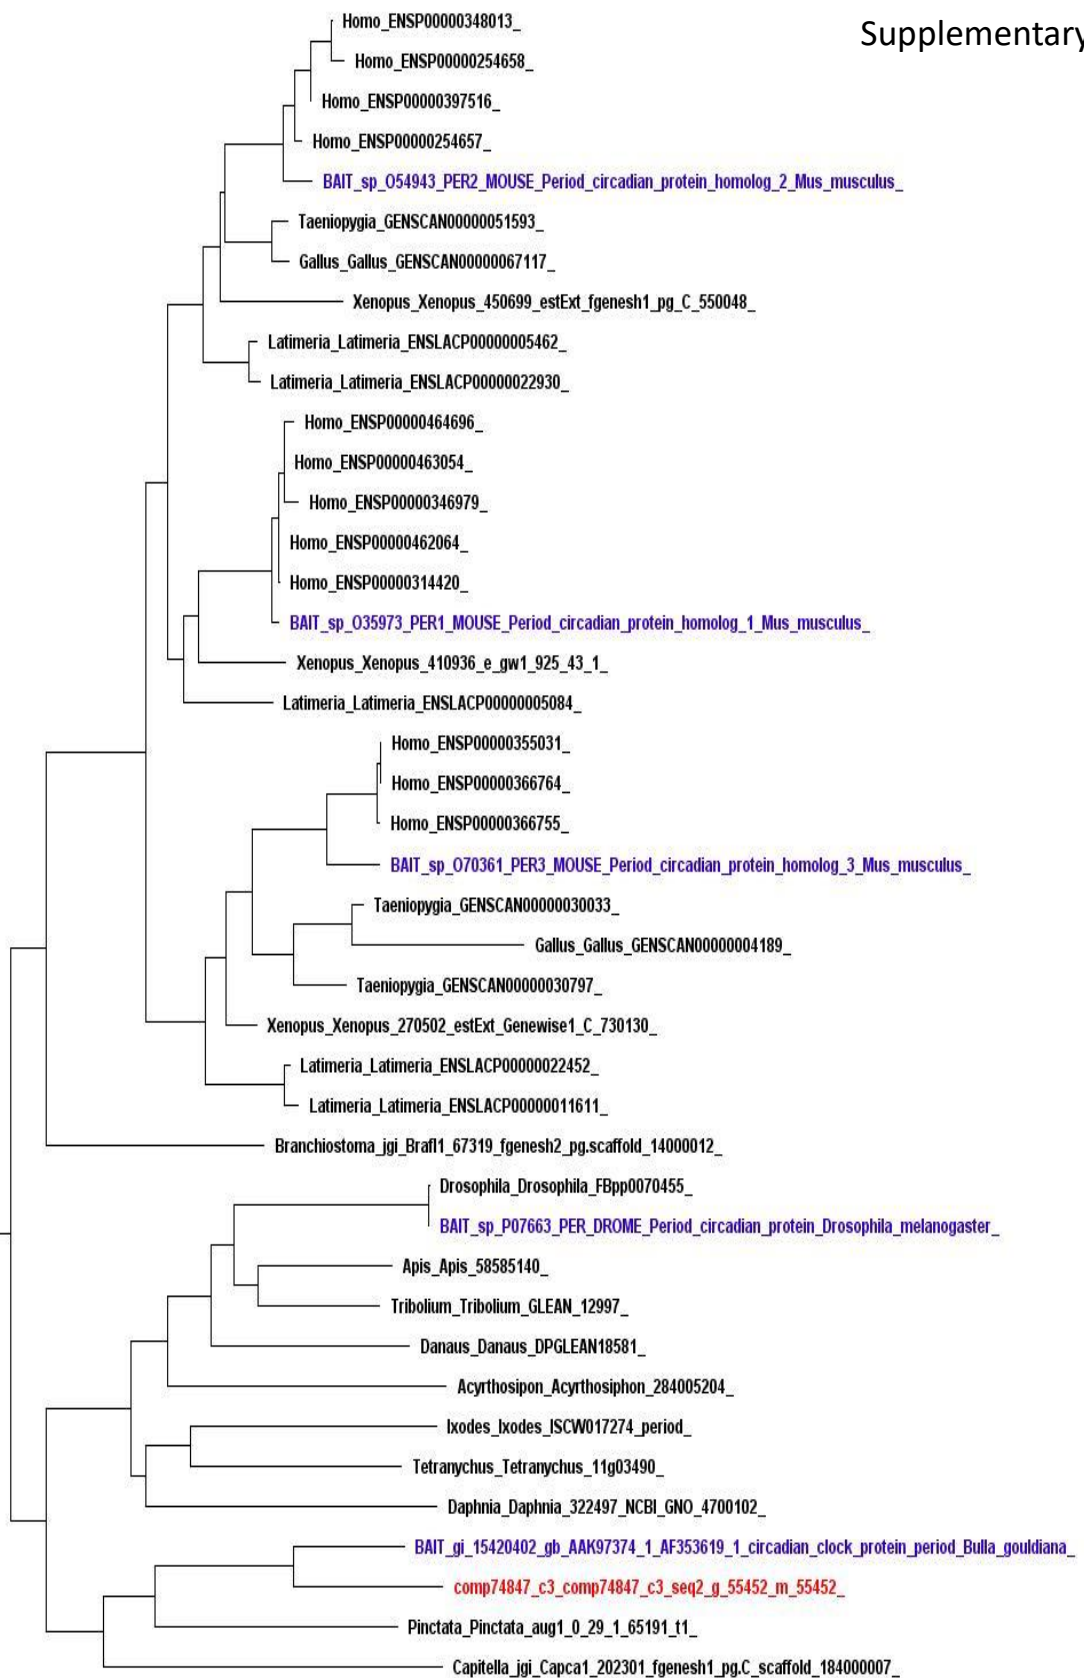

# Supplementary Fig. 4

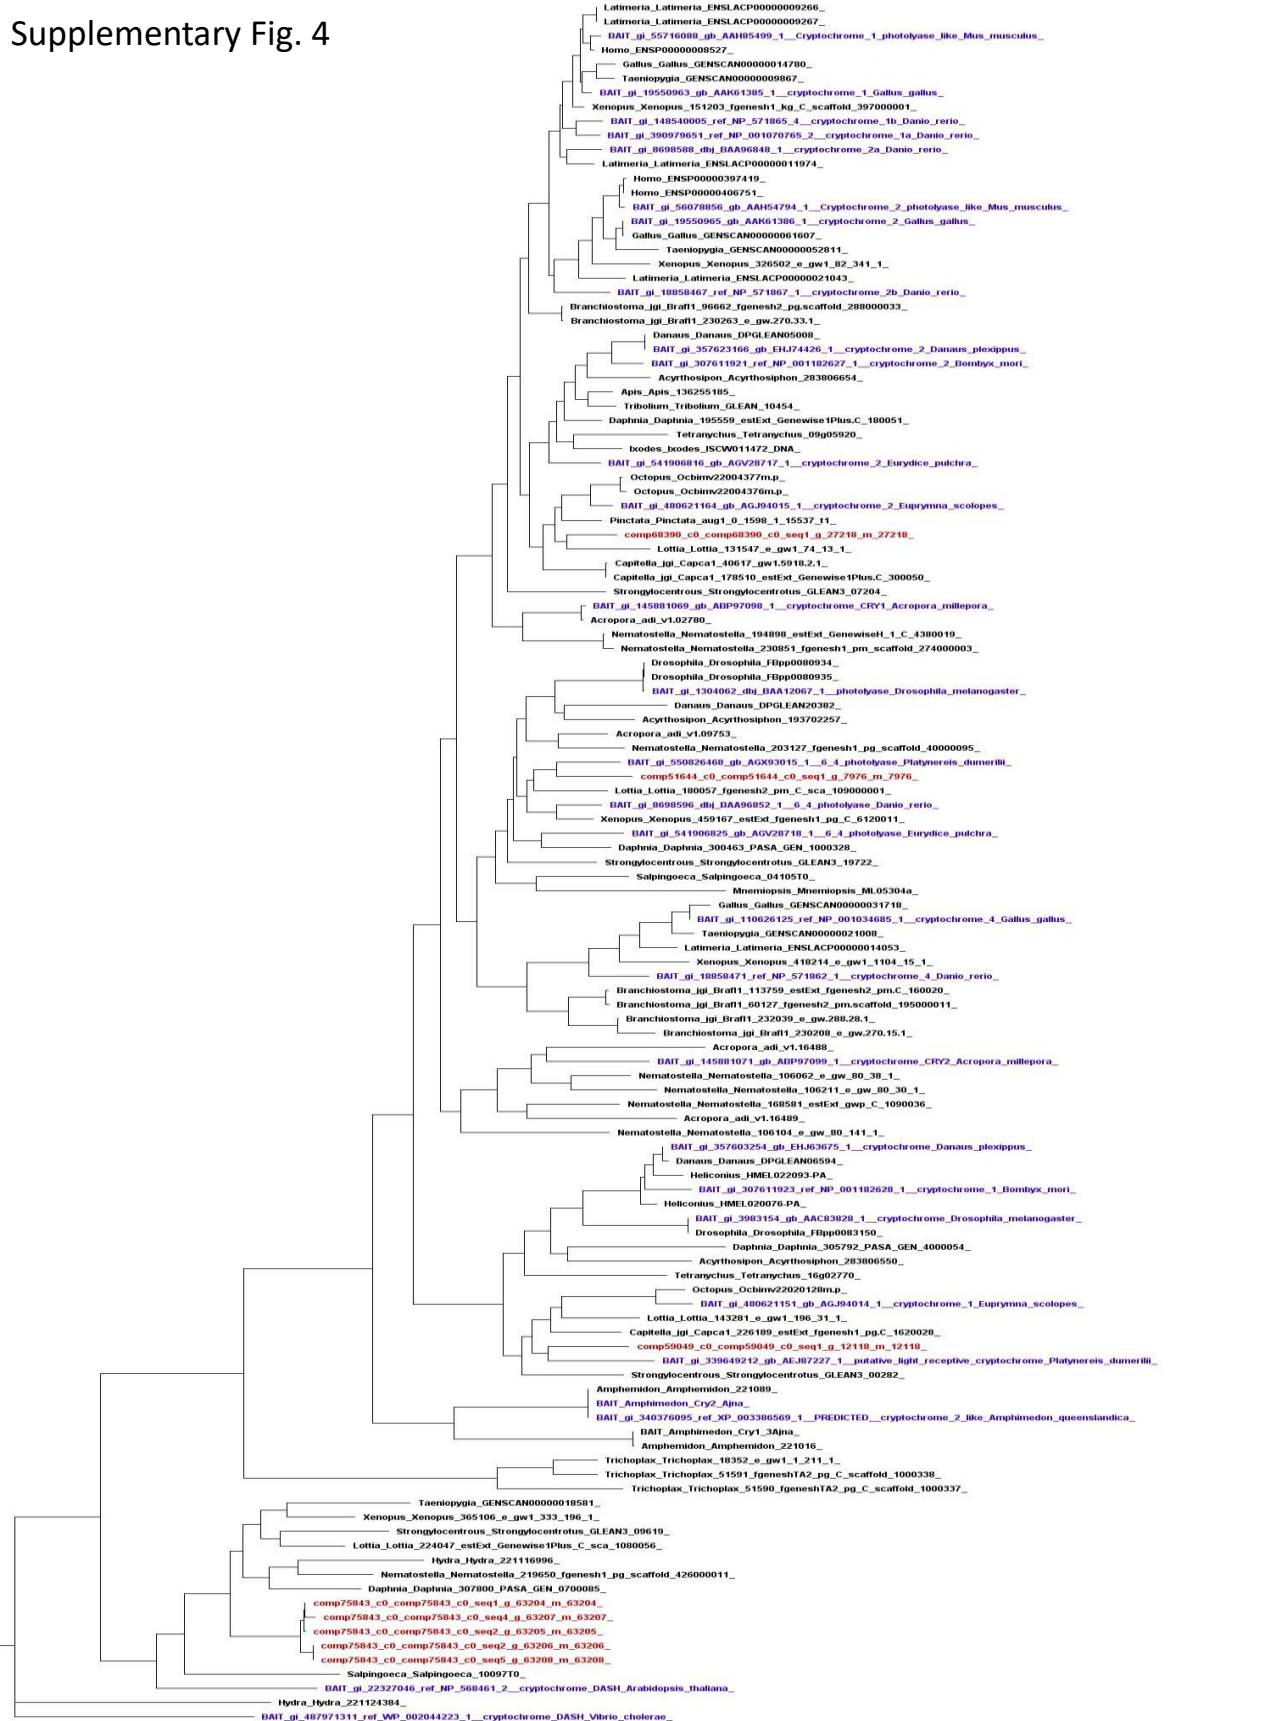

# Supplementary Fig. 5

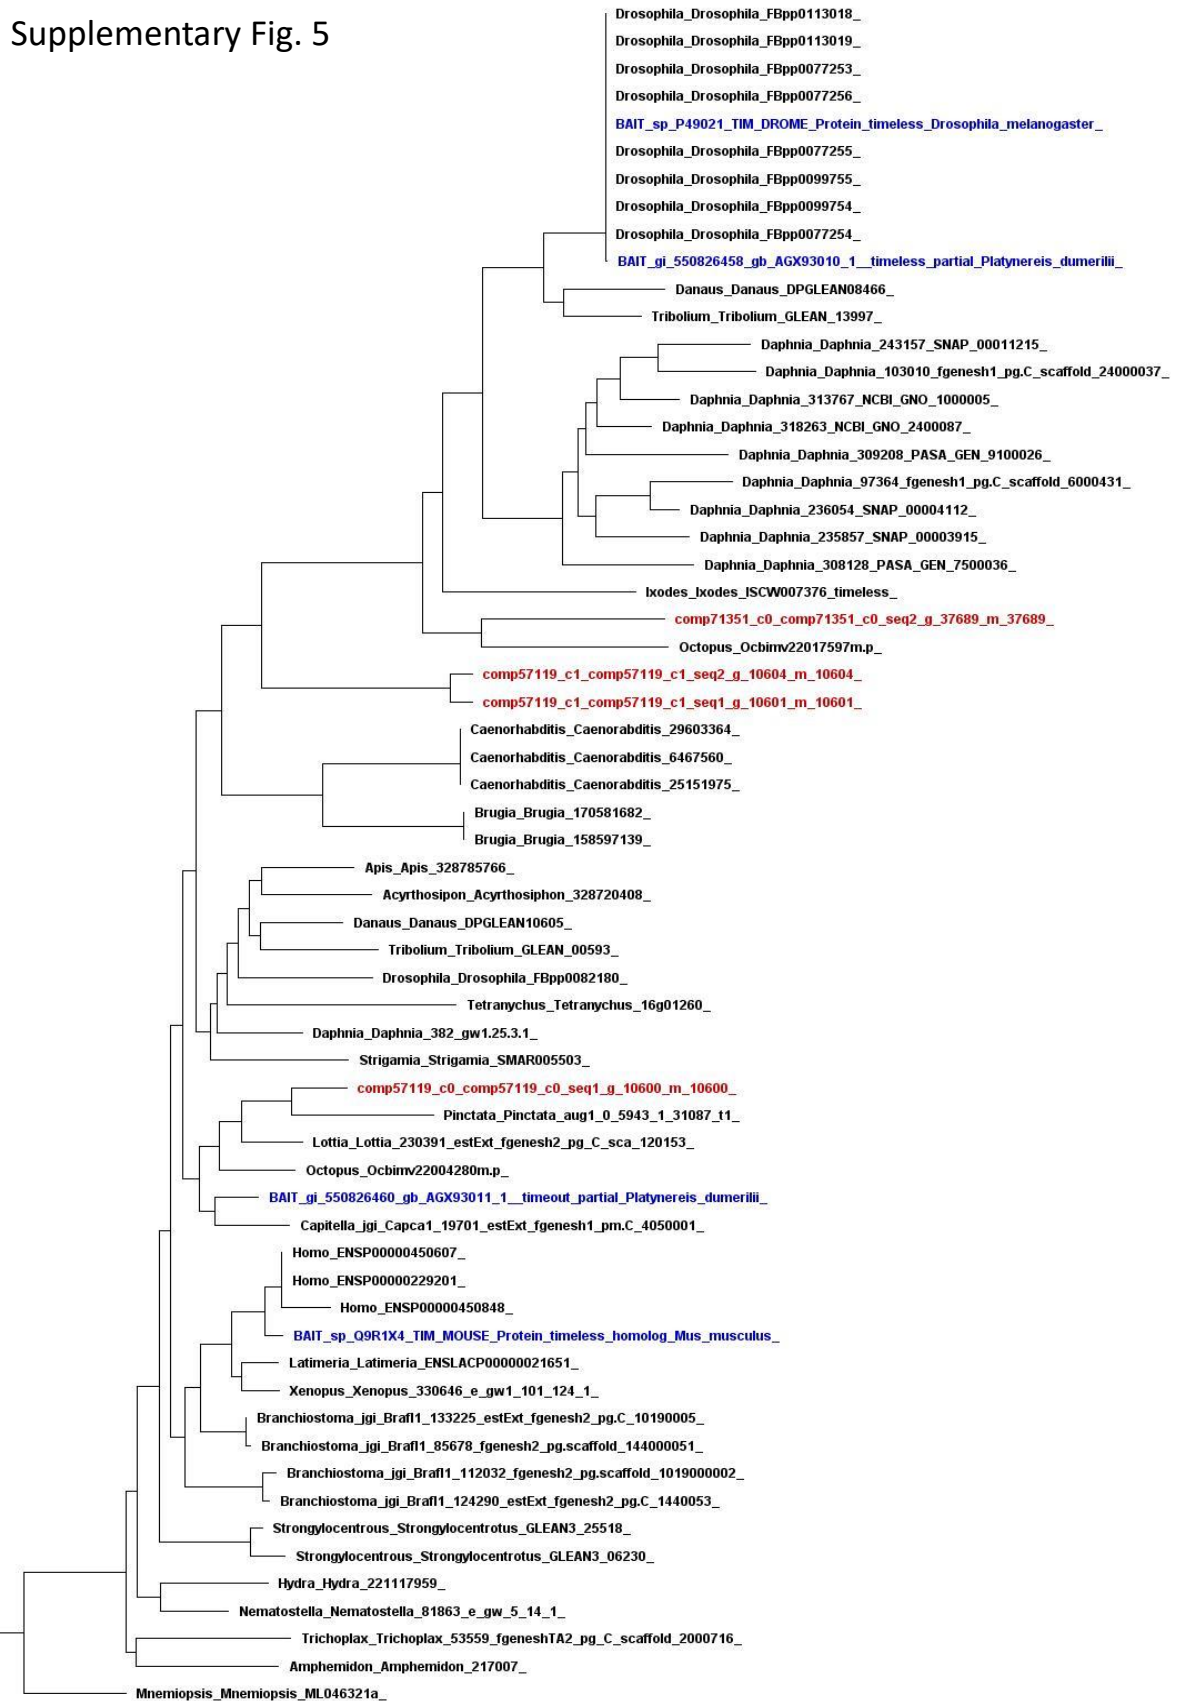



# Supplementary Fig. 7

```
Melibe_PERIOD      SSEMATVLH-----SKERK-----KEKAKEFMKK
Hermisenda_PERIOD SSEMASVTH-----SKERK-----KEKAKEFMKK
Tritonia_PERIOD    SSEMASVMR-----SKERK-----KEKAKEFMKK
Bulla_PERIOD       SSEMASAMQ-----SKEKK-----KERAKEFMKK
Drosophila_PERIOD  VEQQICRELQDQQHGKEDHSEPPQAIEQLQQEEEEEDQSGSESEADRVEGVAKSEAAQSFPI-
                   .:                .:..:                .* *:*

Melibe_PERIOD      LKSMPLPIKERMVKMDTLSTLEQVNNMRRLSEGQ-RKEEFKTPQAY-----FETY
Hermisenda_PERIOD LKSMPLPKERKVKMDTLSTLEQVNNMKRLSESQ-RRDSEFKSPHMY-----SGAY
Tritonia_PERIOD    LKSMPLVKERMIKMDTLSTLEQVNNMKRLSEGQ-RKEEFKTPLVY-----TGTF
Bulla_PERIOD       LKSVLPMKERTGKMDTLSTLEQLVNSMKQLNEEK-KVEHEFKTPPPH-----SGSF
Drosophila_PERIOD  -PSPLSVTIVPPSMGGCGGV---GHAAGLDSGLAKFDKWEAGPGKLESMTGVGAAAAG
                   * * :.      .* . :      . *.. : :   : : : : :

Melibe_PERIOD      HSDADNLLQSDMYVSVSMKNHIVLAASQALMLHLGYPSDWWKNRLLLDLFMSKQDVNTVN
Hermisenda_PERIOD HSLDADKLQSDMYISVSLKNHVQVQTASSLMLTHLGYPTDWWKGRLLRDLFLSKKDINTVN
Tritonia_PERIOD    HSMADAKLLQSDMFI SVSLKNHIVQTASQALMTQLGYPADWWKGRLLRDLFLSKNDANTVN
Bulla_PERIOD       HSSDGEKLSQSEMYITMTLKNHVQVQTASPLMEHLGYPVDWWKGRLLKDF INKMDMNTLN
Drosophila_PERIOD  TGQRGERVKEDSFCCVISMHGDGIVLYTTPSITDVLGYPRDMWLGRSFDIVHLKDRATFA
                   . .:..: :..: : : : : : * : : : * * * * * . * : * : * : *

Melibe_PERIOD      RCLAQYTKDEGEMSKASGESSTSVSSTVTSKGEGSKYFFARIRRFRKLTGDG-F-SFHNVV
Hermisenda_PERIOD GCLAHFFKKEEQEPRTLAGESSMAVT--STSNSQGSRYFFARIRRFRKLSEG-F-SIQNVV
Tritonia_PERIOD    GCLAQYSKEEHEPSKVAGEDNTSVTSSLSNPKDGTCKFFARIRRFRKLTES-F-SIQNVV
Bulla_PERIOD       SCIAHYSTDEAADNFE-----SSNGTRVTKEGSKYFYARIRRFRKLGGG-F-SIQNVV
Drosophila_PERIOD  SQITTGIP I-----AESRGSVPKDAKSTFCVMLRRYRGLKSGGFGVIGRPV
                   : :                . . . . * . : * : * * * * * . * : . *

Melibe_PERIOD      AYC PFVMTVTASTPHQFKVKDK-----TATATKMRKCLVLHCRPVTSAYGADGSL--PAE
Hermisenda_PERIOD SYSPFVMTVTMARTSEHQTDSDKDGLGSSSDGRIKASLVVYCHPLTSA YTDATTL--PFE
Tritonia_PERIOD    SYSPFVMTVKTPKPSDATAGED-----DKDASKPRKSLFIYCRPVTSAYTDQESL--PTD
Bulla_PERIOD       SFCPFMMMISSKTVELSES-----EEDSGRVRRLSVLYCKPLNSAYGNGGIL--PDK
Drosophila_PERIOD  SYEPFRLGLTFREAPEEARPDN-----YMVSNGTNMLLVICATPIKSSYKVPDEILSOKS
                   : : * * : : . * . : . * : * * * * * : : .

Melibe_PERIOD      RQFSLRHSSSCKYTNVDPSVIPLLGHLPQDFNGKSI FDLYHPEDYTKLLDIHKKI---IQ
Hermisenda_PERIOD RQFSLRHSPSCKYTDVEPSAIALLGHLQDFNGKSI FDLYHPDDYKLLDIHRRV---VQ
Tritonia_PERIOD    RHFSVRHCSSCKYTDVEPSAIPLLGHLPQDFNGRSI FDFYHPDDYQKLLDIHKKI---IQ
Bulla_PERIOD       RNFSLRHSLFCNYTYAHPNAVRLGLFLPQDFSGMSI FDLYHPDDFQQLLDIHIRI---ML
Drosophila_PERIOD  PKFAIRHTATGII SHVDSAAVSALGYLPQDLIGRSIMDFYHHEDLSVMKETYETVMKKGQ
                   : * : * * : : . . . : * * . * * * * : * * * * * * * : : : :

Melibe_PERIOD      SMGQPFKTD SIRLKTNRNGCYIELATEWSSFINPWSMRLEFIIGQHTVIRGSRPDVDFEDV
Hermisenda_PERIOD CKGKPFKTD RIRLKTNRNCFIELETEWSSFTNPWTTTRLEFIIGQHTVVKGNRHRDVFEDI
Tritonia_PERIOD    SMGQPFKTD SIRLKTNRNGCYVELETEWSSFINPWSMKLEFIIGQHTVIKGPSLCDVFTAR
Bulla_PERIOD       SMGQPFKSGSIRLKTNRNGCYVEVETEWSSFMNPWSMRLEFIIGQHTVIKGNPDLFEDL
Drosophila_PERIOD  TAGASFC SKPYRFLIQNGCYVLETEWTSFVNPWSRKLEFVVGHHRVFGPKQCNVFEAA
                   * * : * : * . * : : : * * * * * * * : * * * * * * * : * *
```

# Supplementary Fig. 8

Melibe\_CRY2 --MKEDINDNKNQSKKQVLFWFRKGLRLHDNPALYSAIDG---AVTYRCVYILDPFAGA  
Hermissenda\_CRY2 MKESLGQDRLGHKNKKH VLFWFRKGLRLHDNPALYSALVEGGVASTYRCVYILDPFAGA  
Tritonia\_CRY2 MKEHNNITEDKIPQKKH VLFWFRKGLRLHDNPALFNAIEG---ALTYRCVYILDPFAGA  
Crassostrea\_CRY2 -----MSKSSKRKH VVHFRKGLRLHDNPALREALKG---SSSYRCVYILDPFAGS  
.:\*:\*:.\*\*\*\*\*:\*.\*: : :\*\*\*\*\*:

Melibe\_CRY2 SQVGINKWRFLLESLEDLNSLRKLNLSRFLVARGQPADVLPRLFQEWRIITLAFEEDESEF  
Hermissenda\_CRY2 SQVGINKWRFLLESLEDLNSLRKLNNSRFLVARGQPADILPRLFQEWGITLAFEEDESEF  
Tritonia\_CRY2 SQVGINKWRFLLESLEDLSSLRKLNLSRFLVARGQPADVLPRLFQEWGITLAFEEDESEF  
Crassostrea\_CRY2 SQVGINKWRFLQLCEDLDTSLRKLNLSRFLVLRGQPTDLFPKIFKEWNITLSEFEDEPEF  
\*\*\*\*\*:.\*\*\*\*\*.\*\*\*\*\*.\*\*\*\* \*:\*:\*:\*:\* \*:\*:\*:\* \*

Melibe\_CRY2 YGKERDSAISAMAREFNIQVISKSSHTLYNPKTVIAANGNSPPLTYKRFQSI LSTLDPPE  
Hermissenda\_CRY2 FGKERDVALSTMAREFHIQVISKSSHTLYNPKTVIAANGNSPPLTYKRFQSI LSSLDPPA  
Tritonia\_CRY2 YGKERDAAISTMAREFHIQVISKSSHTLYNPKTVIAANGNSPPLTYKRFQSI LSTLDPPE  
Crassostrea\_CRY2 FGKERDGAIQMLAKEAGVEVIVKTSHTLYDLQKI AMNGGSPPLTYKRFQSVLAKMEAPS  
:\*\*\*\*\* \*:. ::\* \* ::\* \* :\*\*\*\*\*: :.\* \* \*..\*\*\*\*\*:.\*:.\* \*

Melibe\_CRY2 QPCDTVGANVVKKSVPVTDHDDRFVPTLDELGFDTDSLGPSPKFGGSEALARLHRH  
Hermissenda\_CRY2 QPCETVSGQVVKDSVTITSDHDDRFVPTLDELGFDTDLGPAKFGGSEALARLYRH  
Tritonia\_CRY2 QPYETVSSHVVKKSATPVADHDDRFVPTLDELGFDTDSLGPSPKFGGSEALARLHRH  
Crassostrea\_CRY2 EPEETINSGFLVKTKTPIAEDHDDKYGVPTLEELGFDTTEGLGPAVFHGGAEALTRLERH  
:\* :\*:. .: .: \* :\*:\*\*\*\*\*:.\*\*\*\*\*\*: \*:\* \*:\*:\*:\*:\* \*

Melibe\_CRY2 LERKAWVASFERPKMSPQSLYPSGTGLSPYLRFGCLSPKTFYWKLTLEYKVKKIDPPL  
Hermissenda\_CRY2 LERKAWVASFERPKMSPQSLYPSGTGLSPYLRFGCLSPRTFYWKLTLEYKVKKIDPPL  
Tritonia\_CRY2 LERKAWVASFERPKMSPQSLYPSGTGLSPYLRFGCLSPKTFYWKLTLEYKVKKIDPPL  
Crassostrea\_CRY2 LERKAWVASFERPKMQSLFQSNVLSPYLRFGCLSRFLFYWKLTLEYKVKKIDPPL  
\*\*\*\*\* \*:\*:\* \* . \*\*\*\*\* : \*\*\*\*\* \*:\*:\* \* \* \* \*

Melibe\_CRY2 ALHGQLLWREFFYTVSTNPNKFDPMVGNICVQIPEWHNPEALAKWAEGMTGYPWIDAIM  
Hermissenda\_CRY2 ALHGQLLWREFFYTVSTNNSKFDPMVGNICVQIPEWHNPEALAKWAEGMTGYPWIDAIM  
Tritonia\_CRY2 ALHGQLLWREFFYTVSTNPNKFDPMVGNICVQIPEWHNPEALAKWAEGMTGYPWIDAIM  
Crassostrea\_CRY2 SLHGQLLWREFFYTVATNPNKFDPMVGNICVQIPEWHNPEALAKWAEGMTGYPWIDAIM  
:\*\*\*\*\*:.\* \* : \* \* . \* :\*\*\*\*\*:.\*\*\*\*\*\* \*:\*.\*\*\*\*\*\*

Melibe\_CRY2 IQLRKEGWIHHLARHAVACFLTRGDLWISWEEGMKVFDEMLLDADWSVNAGTMMWLSCSA  
Hermissenda\_CRY2 VQLRKEGWIHHLARHAVACFLTRGDLWISWEEGMKVFDEMLLDADWSVNAGMWMWLSCSA  
Tritonia\_CRY2 VQLRKEGWIHHLARHAVACFLTRGDLWISWEEGMKVFDEMLLDADWSVNAGMWMWLSCSA  
Crassostrea\_CRY2 MQLRQTGWIHHLARHVSACFLTRGDLWISWEEGMKVFDEMLLDADWSVNAGMWMWLSCSA  
:\*:\*: \*:\*:\*.\*:\*:\*.\*\*\*\*\*\*:.\*:\*\*\*\*\*\* \*:\*:\*:\* \*

Melibe\_CRY2 FFQQFFHCYCPVGFGRADPSGDFVRQYLPVLKNMPTQYIYEPWTAPESVQKAAKCI V GK  
Hermissenda\_CRY2 FFQQFFHCYCPVGFGRADPSGDFVRQYLPVLKNMPTQYIYEPWTAPESVQKAAKCV V GK  
Tritonia\_CRY2 FFQQFFHCYCPVGFGRADPSGDFVRQYLPVLKNMPTQYIYEPWTAPESVQKAAKCI V GK  
Crassostrea\_CRY2 FFQQFFHCYCPVGFGRADPTGDFIRTYLPVLKGYPAKYIYEPWTAPESVQRAAKCI I GE  
\*\*\*\*\*:.\* \* \* \* \* \* . \* :\*\*\*\*\*:.\*:\*:\* \*

Melibe\_CRY2 DYPLPMVAHAEQSRINLERMRQIYKRLVVKSTAS---KRIFLDLPKI-----PKVGMFLS  
Hermissenda\_CRY2 DYPLPMVAHAEQSHINLERMRQYKRLVVKSTAS---KRIFLDLPKI-----PKVGMFLS  
Tritonia\_CRY2 DYPLPMVAHAEQSRVNLERMRHVYKRLVVKSTAS---KQIFLDLPKI-----PKVGMILS  
Crassostrea\_CRY2 DCPVPMVNAHEVSKLNTGRMKQVYQQQLAVYASIASVPKQIHSEEPYSKHEKAMHSGNHPS  
\* \*:\*:\* \* \* \* \* \* \* \* : \* \* \* \* \* : \* \* \* \* \* : \* \* \* \* \*



# Supplementary Fig. 9

```
Hermissenda_TIMEOUT      -----MDVELQATCSALGYLEGNVYVKEPDCLETVKDLIRFLRRSDTCDIRRQLGHAKI
D_melanogaster_TIMEOUT   --MSILLADIDATCAALGYSDGQKYQAEFDDAAEGLKHLIWIWLRRLDNHEYRRHLGRSKV
Homo_sapiens_TIMEOUT     MDLHMMNCELLATCSALGYLEGDTYHKEPDCLESVKDLIRYLRHEDETRDVRQQLGAAQI
                          :  :: ***:*** :*: *  ** . * :*.** **: :. : *:* ** :::

Hermissenda_TIMEOUT      VANDLIPLFKTYHADKTLFETVVKLLVNLTPVAACFNNQIPDEKTLRNFCLIEIETHLQD
D_melanogaster_TIMEOUT   LQTDLVYMLPDYVHHEELSDLLIRLLVILTNPTLLLYREGAPKDNHGRKVFMEIIDLQGG
Homo_sapiens_TIMEOUT     LQSDLLPILTQHHQDKPLFDAVIRLMVNLTPALLCFGN-LPKEPSFRHHFLQVLTLYLQA
                          : .** : : : .: * : :::*: * **:* . : : *.: * : ::: **

Hermissenda_TIMEOUT      TKEAFVDELFGVLADKIKDILQLDWRREEDYLQLERLFIIVRNVLMIIPDPGRELRT
D_melanogaster_TIMEOUT   YKAAFADKQVWVSALEKFKQALEIAFAIRSEEQNLLIERILVLRNVLQVPANPEAECRA
Homo_sapiens_TIMEOUT     YKEAFASEKAFGVLSETLYELLQLGWEERQEDNLLIERILLVLRNIVLHVPADLDQEKKI
                          * **... : :.* : : : * : : : * ** : * :***:***.* : * : * :

Hermissenda_TIMEOUT      DDDATIHDQILWASHTSGLEDLLLVASSDRERSRLCMHVMEIISLMFREQEVELAFAG
D_melanogaster_TIMEOUT   DNDASLHDQVIWALHQTGMLDLVLFVISSPDE-EQFHLHGLEIVCLLFREQSAESLADAS
Homo_sapiens_TIMEOUT     DDDASAHQQLLWAIHLSGLDLLLLFLASSAE-EQWSLHVLEIVSLMFRDQNPQLAGVG
                          *:***: ***:*** * :*: ***:** : ** * .: :* :***.*:***.* * ** ..

Hermissenda_TIMEOUT      VQRSMTEKEKQRELEKAREKEKAMKKANILKYSARHSRFGGTFVKNVKSITESNVIYH
D_melanogaster_TIMEOUT   LQRSLSEKQRDQQLLAARRRERARRQAR--PPPGRHSRFGGTYVTRNMKSVSDRDVICH
Homo_sapiens_TIMEOUT     QGRLAQERSADFAEVLVLRQREMAEKKTRALQGRNRHSRFGGSYIVQGLKSIGERDLIFH
                          * *.: * ** * :.* * : :. . *****: : : : : ** : : : * *
```

**Supplementary Table 1**

| <b>Analysis</b>              | <b>Protein</b> | <b>Phylum</b> | <b>Species</b>                   | <b>Accession Number</b> |                |
|------------------------------|----------------|---------------|----------------------------------|-------------------------|----------------|
| CLOCK                        | CLOCK          | Annelida      | <i>Platynereis dumerilii</i>     | AGX93013.1              |                |
|                              |                | Arthropoda    | <i>Acyrtosiphon pisum</i>        | NP_001164531            |                |
|                              |                |               | <i>Apis mellifera</i>            | XP_394233.4             |                |
|                              |                |               | <i>Camponotus floridanus</i>     | XP_011266082.1          |                |
|                              |                |               | <i>Drosophila melanogaster</i>   | O61735.3                |                |
|                              |                |               |                                  | AGV28720, AGV28721,     |                |
|                              |                |               | <i>Eurydice pulchra</i>          | AGV28722, AGV28723      |                |
|                              |                |               | <i>Macrobrachium rosenbergii</i> | AAX44045.1              |                |
|                              |                |               | <i>Thermobia domestica</i>       | BAJ16353.1              |                |
|                              |                | Chordata      | <i>Danio rerio</i>               | NP_571032.2             |                |
|                              |                |               | <i>Homo sapiens</i>              | AAB83969.1              |                |
|                              |                |               | <i>Mus musculus</i>              | Gene ID: 12753          |                |
|                              |                |               | <i>Rattus norvegicus</i>         | NP_068628.1             |                |
|                              |                |               | <i>Xenopus laevis</i>            | AAF34772.1              |                |
|                              |                | Cnidaria      | <i>Nematostella vectensis</i>    | XP_001639742.1          |                |
|                              |                | Mollusca      | <i>Aplysia californica</i>       | XP_012945840.1          |                |
| <i>Biomphalaria glabrata</i> | XP_013079457   |               |                                  |                         |                |
| <i>Crassostrea gigas</i>     | AQM57601.1     |               |                                  |                         |                |
| BMAL1-CYCLE                  | BMAL1          | Annelida      | <i>P. dumerilii</i>              | AGX93014.1              |                |
|                              |                | Arthropoda    | <i>E. pulchra</i>                | AGV28715.1              |                |
|                              |                |               | <i>Pacifastacus leniusculus</i>  | AFV39705.1              |                |
|                              |                |               |                                  |                         |                |
|                              |                | Chordata      | <i>D. rerio</i>                  | AAF64395.1              |                |
|                              |                |               | <i>H. sapiens</i>                | BAA19935.1              |                |
|                              |                |               | <i>M. musculus</i>               | Q9WTL8.2                |                |
|                              |                |               | <i>R. norvegicus</i>             | BAA33450.1              |                |
|                              |                |               | <i>X. laevis</i>                 | AAW80970.1              |                |
|                              |                |               |                                  |                         |                |
|                              |                | Mollusca      | <i>C. gigas</i>                  | AQM57603.1              |                |
|                              |                | CYCLE         | Arthropoda                       | <i>A. pisum</i>         | NP_001164574.1 |
|                              |                |               |                                  | <i>Aedes aegypti</i>    | AEX32872.1     |

|               |        |            |                                 |                                   |
|---------------|--------|------------|---------------------------------|-----------------------------------|
|               |        |            | <i>D. melanogaster</i>          | AAF49107.1                        |
|               |        |            | <i>Danaus plexippus</i>         | EHJ64590.1                        |
|               |        |            | <i>T. domestica</i>             | BAJ16354.1                        |
| PERIOD        | PERIOD | Arthropoda | <i>Antheraea pernyi</i>         | AAA64675.1                        |
|               |        |            | <i>A. mellifera</i>             | UniProtKB: Q9NDF3                 |
|               |        |            | <i>Bombyx mori</i>              | NP_001036975.1                    |
|               |        |            | <i>D. plexippus</i>             | AAO48719.1                        |
|               |        |            | <i>D. melanogaster</i>          | AAF45804.1                        |
|               |        |            | <i>E. pulchra</i>               | AGV28714.1                        |
|               |        |            | <i>Macrobrachium nipponense</i> | ANN13870.1                        |
|               |        |            | <i>Musca domestica</i>          | AAD39163.1                        |
|               |        |            | <i>Periplaneta americana</i>    | AAA64677.2                        |
|               |        |            | <i>Tribolium castaneum</i>      | NP_001106933.1                    |
|               |        | Chordata   | <i>D. rerio</i>                 | NP_997604.2, NP_878277.2          |
|               |        |            | <i>H. sapiens</i>               | O15534.2, O15055.2                |
|               |        |            | <i>M. musculus</i>              | O35973, O54943                    |
|               |        |            | <i>R. norvegicus</i>            | Q8CHI5.2, Q9Z301.1                |
|               |        |            | <i>X. leavis</i>                | NP_001079172.2,<br>NP_001081098.1 |
|               |        | Mollusca   | <i>Bulla gouldiana</i>          | AAK97374.1                        |
|               |        |            | <i>C. gigas</i>                 | AQM57604.1                        |
|               | NPAS   | Mollusca   | <i>C. gigas</i>                 | EKC18855.1                        |
| CRYPTOCHROMES | NPCRY  | Annelida   | <i>P. dumerilii</i>             | AGX93012.1                        |
|               |        | Arthropoda | <i>Anopheles gambiae</i>        | ABB29887.1                        |
|               |        |            | <i>A. pernyi</i>                | ABO38435.1                        |
|               |        |            | <i>D. plexippus</i>             | EHJ74426.1                        |
|               |        |            | <i>Daphnia pulex</i>            | EFX82092.1                        |
|               |        |            | <i>Euphausia superba</i>        | CAQ86665.1                        |
|               |        |            | <i>E. pulchra</i>               | AGV28717.1                        |
|               |        | Chordata   | <i>Astyanax mexicanus</i>       | AHA91700.1                        |

|          |          |            |                                 |                                                            |
|----------|----------|------------|---------------------------------|------------------------------------------------------------|
|          |          |            |                                 | NP_571865.4,<br>NP_001070765.2, BAA96848.1,<br>NP_571867.2 |
|          |          |            | <i>D. rerio</i>                 |                                                            |
|          |          |            | <i>Gallus gallus</i>            | AAK61385.1, AAK61386.1                                     |
|          |          |            | <i>M. musculus</i>              | AAH85499.1, AAH54794.1                                     |
|          |          |            | <i>Xenopus tropicalis</i>       | NP_001017311.2                                             |
|          |          | Cnidaria   | <i>Amphimedon queenslandica</i> | XP_003386569                                               |
|          |          | Mollusca   | <i>A. californica</i>           | XP_012941094.1                                             |
|          |          |            | <i>C. gigas</i>                 | AQM57602.1                                                 |
|          |          |            | <i>Euprymna scolopes</i>        | AGJ94015.1                                                 |
|          | PCRY     | Arthropoda | <i>A. gambiae</i>               | ABB29886.1                                                 |
|          |          |            | <i>A. pernyi</i>                | AAK11644.1                                                 |
|          |          |            | <i>D. plexippus</i>             | EHJ63675.1                                                 |
|          |          |            | <i>D. melanogaster</i>          | AAC83828.1                                                 |
|          |          | Mollusca   | <i>C. gigas</i>                 | ANJ02841.1                                                 |
|          |          |            | <i>E. scolopes</i>              | AGJ94014.1                                                 |
|          |          |            |                                 |                                                            |
| TIMELESS | TIMELESS | Arthropoda | <i>A. aegypti</i>               | AAY40757.1                                                 |
|          |          |            | <i>B. mori</i>                  | ABD52733                                                   |
|          |          |            | <i>D. plexippus</i>             | EHJ67997.1                                                 |
|          |          |            | <i>D. pulex</i>                 | EFX80829                                                   |
|          |          |            | <i>D. melanogaster</i>          | P49021.3                                                   |
|          |          |            | <i>E. pulchra</i>               | AGV28716.1                                                 |
|          |          |            | <i>Gryllus bimaculatus</i>      | BAJ16356.1                                                 |
|          |          |            | <i>T. domestica</i>             | BAL27710.1                                                 |
|          |          |            | <i>T. castaneum</i>             | EFA04644.2                                                 |
|          |          | Mollusca   | <i>C. gigas</i>                 | KX371077.1                                                 |
| TIMELESS | TIMEOUT  | Arthropoda | <i>D. plexippus</i>             | EHJ76705.1                                                 |
|          |          |            | <i>D. melanogaster</i>          | AAF54908.3                                                 |
|          |          |            | <i>T. castaneum</i>             | TC000593                                                   |
|          |          | Chordata   | <i>D. rerio</i>                 | NP_001265529                                               |
|          |          |            | <i>H. sapiens</i>               | NP_003911                                                  |
|          |          |            | <i>R. norvegicus</i>            | Q9Z2Y1.1                                                   |

|          |                               |                |
|----------|-------------------------------|----------------|
|          | <i>X. leavis</i>              | BAE45344.1     |
| Cnidaria | <i>N. vectensis</i>           | XP_001641000.1 |
| Nematoda | <i>Caenorhabditis elegans</i> | NP_499594.2    |

**Supplementary Table 2**

| <b>Protein</b> | <b>Accession Number</b> | <b>Species</b>                 | <b>Protein description</b>                                               | <b>BLAST score</b> | <b>E-value</b> | <b>Percent Identity</b> |
|----------------|-------------------------|--------------------------------|--------------------------------------------------------------------------|--------------------|----------------|-------------------------|
| BMAL1          | XP_013096539.1          | <i>Biomphalaria glabrata</i>   | PREDICTED: aryl hydrocarbon receptor nuclear translocator-like protein 1 | 867                | 0              | 69                      |
|                | XP_014775902.1          | <i>Octopus bimaculoides</i>    | PREDICTED: protein cycle-like isoform X1                                 | 636                | 0              | 56                      |
|                | XP_014775904.1          | <i>Octopus bimaculoides</i>    | PREDICTED: protein cycle-like isoform X3                                 | 636                | 0              | 55                      |
|                | XP_014775903.1          | <i>Octopus bimaculoides</i>    | PREDICTED: protein cycle-like isoform X2                                 | 633                | 0              | 56                      |
| CLOCK          |                         | <i>Mizuhopecten yessoensis</i> | protein cycle-like                                                       | 603                | 0              | 52                      |
|                | XP_012945840.1          | <i>Aplysia californica</i>     | PREDICTED: circadian locomoter output cycles protein kaput-like          | 777                | 0              | 63                      |
|                | XP_013079457.1          | <i>Biomphalaria glabrata</i>   | PREDICTED: circadian locomoter output cycles protein kaput-like          | 764                | 0              | 62                      |
|                | XP_021367049.1          | <i>Mizuhopecten yessoensis</i> | circadian locomoter output cycles protein kaput-like isoform X2          | 473                | 4.00E-156      | 58                      |
|                | AQM57601.1              | <i>Crassostrea gigas</i>       | clock                                                                    | 472                | 5.00E-155      | 56                      |
|                | XP_011429631.1          | <i>Crassostrea gigas</i>       | PREDICTED: circadian locomoter output cycles protein kaput               | 471                | 1.00E-154      | 56                      |
|                |                         |                                |                                                                          |                    |                |                         |
| PCRY           | XP_013075939.1          | <i>Biomphalaria glabrata</i>   | PREDICTED: cryptochrome-1-like                                           | 821                | 0              | 69                      |
|                | XP_005089742.1          | <i>Aplysia californica</i>     | PREDICTED: cryptochrome-1-like                                           | 811                | 0              | 69                      |
|                | ANJ02841.1              | <i>Crassostrea gigas</i>       | cryptochrome 1                                                           | 680                | 0              | 59                      |
|                | XP_022291740.1          | <i>Crassostrea virginica</i>   | cryptochrome-1-like                                                      | 678                | 0              | 59                      |
|                | XP_011423247.1          | <i>Crassostrea gigas</i>       | PREDICTED: cryptochrome-1 isoform X2                                     | 676                | 0              | 59                      |
| NPCRY          | XP_012941094.1          | <i>Aplysia californica</i>     | PREDICTED: cryptochrome-1-like                                           | 1016               | 0              | 86                      |
|                | XP_013080710.1          | <i>Biomphalaria glabrata</i>   | PREDICTED: cryptochrome-1-like                                           | 870                | 0              | 85                      |
|                | XP_022292416.1          | <i>Crassostrea virginica</i>   | cleavage stimulation factor subunit 3-like                               | 820                | 0              | 72                      |
|                | XP_022292411.1          | <i>Crassostrea virginica</i>   | cleavage stimulation factor subunit 3-like                               | 820                | 0              | 72                      |
|                | XP_021355346.1          | <i>Mizuhopecten yessoensis</i> | cleavage stimulation factor subunit 3-like                               | 813                | 0              | 67                      |

|          |                |                              |                                                    |     |          |    |
|----------|----------------|------------------------------|----------------------------------------------------|-----|----------|----|
| PERIOD   | XP_012944985.1 | <i>Aplysia californica</i>   | PREDICTED: uncharacterized protein<br>LOC101860455 | 976 | 0        | 53 |
|          | XP_013061840.1 | <i>Biomphalaria glabrata</i> | PREDICTED: uncharacterized protein<br>LOC106051222 | 877 | 0        | 44 |
|          | AAK97374.1     | <i>Bulla gouldiana</i>       | circadian clock protein period                     | 764 | 0        | 57 |
|          | AQM57604.1     | <i>Crassostrea gigas</i>     | period                                             | 346 | 7.00E-95 | 30 |
|          | XP_011434455.1 | <i>Crassostrea gigas</i>     | PREDICTED: period circadian protein isoform X2     | 344 | 2.00E-94 | 30 |
| TIMELESS | XP_013061258.1 | <i>Biomphalaria glabrata</i> | PREDICTED: protein timeless-like isoform X2        | 604 | 0        | 51 |
|          | XP_013061257.1 | <i>Biomphalaria glabrata</i> | PREDICTED: protein timeless-like isoform X1        | 603 | 0        | 51 |
|          | XP_012943985.1 | <i>Aplysia californica</i>   | PREDICTED: protein timeless-like                   | 575 | 0        | 51 |
|          | XP_019872456.1 | <i>Aethina tumida</i>        | PREDICTED: protein timeless-like                   | 238 | 4.00E-63 | 31 |
|          | XP_022287880.1 | <i>Crassostrea virginica</i> | protein timeless-like isoform X4                   | 231 | 3.00E-61 | 28 |

Supplementary Table 3

| Clock proteins  | Reference genome                 | Gene name                    | Ensemble subject name | BLAST score | E-value   | Percent identity |
|-----------------|----------------------------------|------------------------------|-----------------------|-------------|-----------|------------------|
| <b>BMAL1</b>    | <i>Drosophila melanogaster</i>   | <i>cycle</i>                 | FBpp0074693           | 407         | 2.00E-135 | 50.75            |
|                 | <i>Mus musculus</i><br>(CL57BL6) | <i>arntl (bmal1)</i>         | ENSMUSP00000147764    | 548         | 0         | 52.08            |
| <b>CLOCK</b>    | <i>D. melanogaster</i>           | <i>clock</i>                 | FBpp0076500           | 333         | 2.00E-101 | 43.86            |
|                 | <i>M. musculus</i> (CL57BL6)     | <i>clock</i>                 | ENSMUSP00000144022    | 381         | 1.00E-120 | 54.08            |
| <b>pCRY</b>     | <i>D. melanogaster</i>           | <i>cry (p-cry)</i>           | FBpp0083150           | 488         | 2.00E-166 | 45.25            |
|                 | <i>M. musculus</i> (CL57BL6)     | <i>cry1 (np-cry)</i>         | ENSMUSP00000020227    | 456         | 4.00E-153 | 45.84            |
| <b>npCRY</b>    | <i>D. melanogaster</i>           | <i>phr6-4</i>                | FBpp0080934           | 516         | 3.00E-177 | 51.2             |
|                 | <i>M. musculus</i> (CL57BL6)     | <i>cry1 (np-cry)</i>         | ENSMUSP00000020227    | 749         | 0         | 70.29            |
| <b>PERIOD</b>   | <i>D. melanogaster</i>           | <i>period</i>                | FBpp0304590           | 159         | 9.00E-39  | 27.49            |
|                 | <i>M. musculus</i> (CL57BL6)     | <i>period2</i>               | ENSMUSP00000066620    | 150         | 6.00E-36  | 29.72            |
| <b>TIMELESS</b> | <i>D. melanogaster</i>           | <i>timeless</i>              | FBpp0401565           | 212         | 5.00E-57  | 29.19            |
|                 | <i>M. musculus</i> (CL57BL6)     | <i>timeless</i><br>(timeout) | ENSMUSP00000100876    | 54.7        | 4.00E-07  | 21.67            |
